# Supplementary material for: Higher order Arabidopsis 14-3-3 mutants show 14-3-3 involvement in primary root growth both under control and abiotic stress conditions
Source: PubMed Central journal article supplement (PMC4203132; doi:10.1093/jxb/eru338), 2014-09-04
Supplement: supp_eru338_jexbot125666_file001.pdf [file supp_eru338_jexbot125666_file001.pdf]

**Higher order *Arabidopsis* 14-3-3 mutants show 14-3-3 involvement in primary root growth both under control and abiotic stress conditions.**

P.J.M. van Kleeff, N. Jaspert, K.W. Li, S. Rauch, C. Oecking and A.H. de Boer

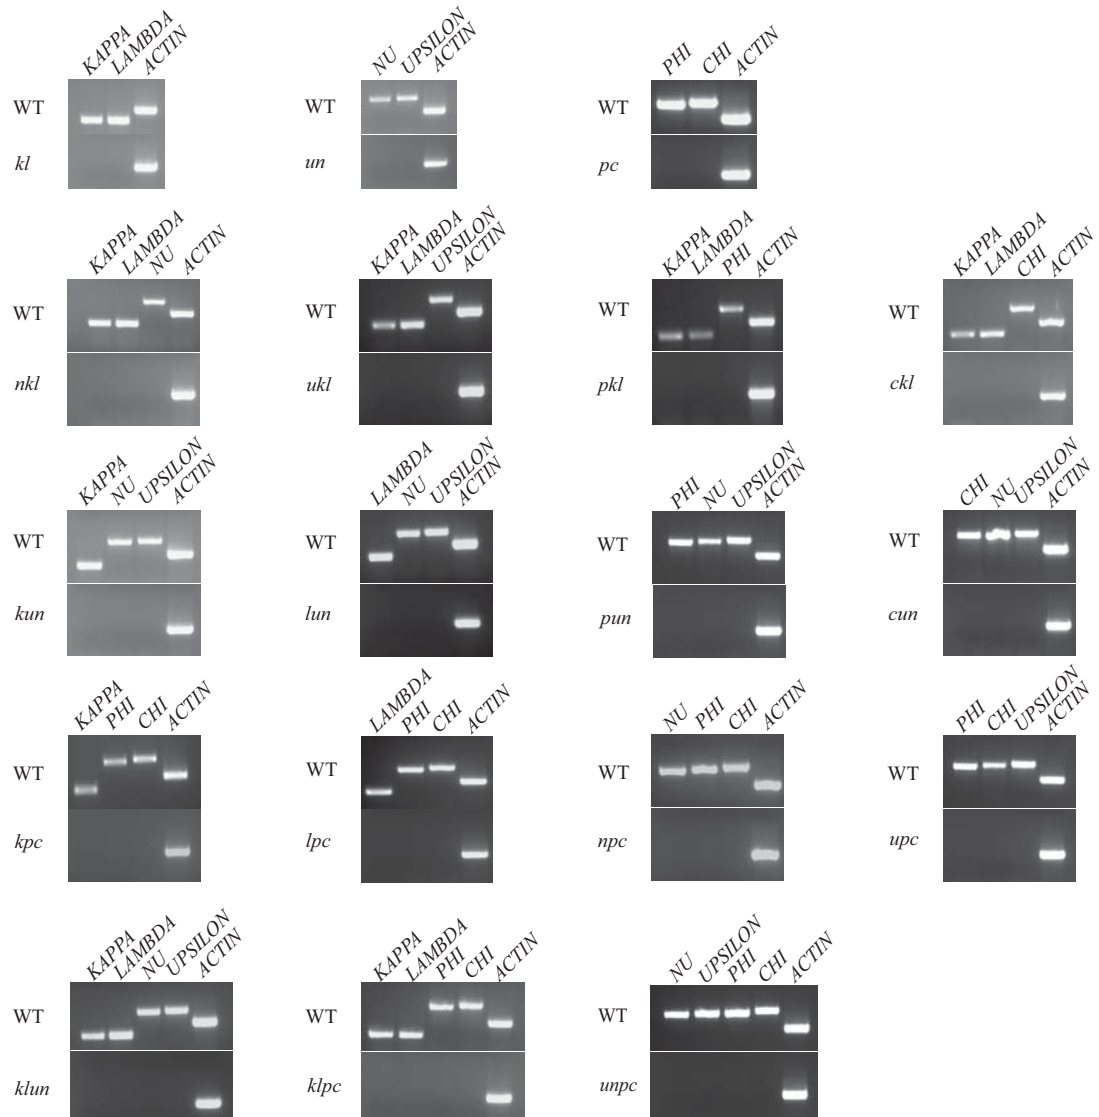

**Figure S1. Transcript PCRs of the higher order 14-3-3 mutants.**

Total RNA was isolated and transcripts were detected using RT-PCR. The mutated 14-3-3 genes show no full length transcripts and are therefore considered being null mutants.

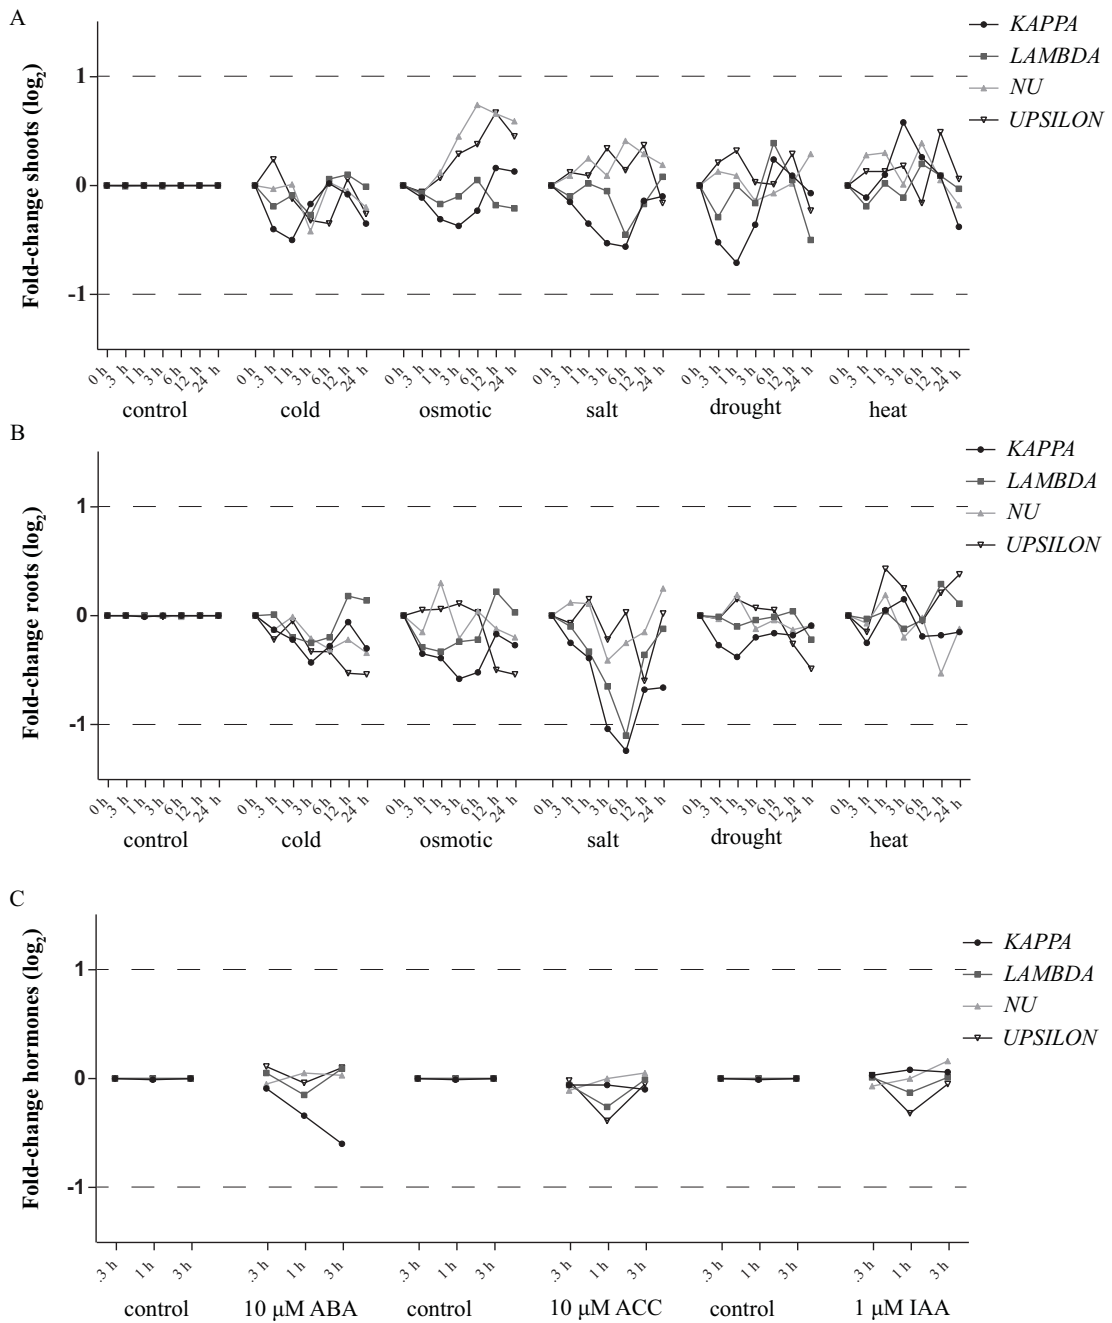

**Figure S2. Expression patterns of 14-3-3 in *Arabidopsis* (Col-0) under various abiotic and exogenous applied hormones from publically available microarray data.**

(A) and (B) treatments used; Cold treatment at 4°C, Osmotic is 300 mM mannitol, Salt is 150 mM NaCl, Drought 14 min in an air stream with loss of approximately 10% fresh weight, Heat 3 h 38°C and recovered at 25°C. (A) At14-3-3 expression in shoots of 18 days after sowing during abiotic stress. (B) At14-3-3 expression in roots of 18 days after sowing during abiotic stress. (C) At14-3-3 expression in 7 day old seedlings stressed with 10 μM ACC, 1 μM IAA and 10 μM ABA. Dashed lines indicate a 2-fold change in 14-3-3 expression
